# Supplementary material
Source: PubMed Central journal article supplement (PMC2529477)

**A**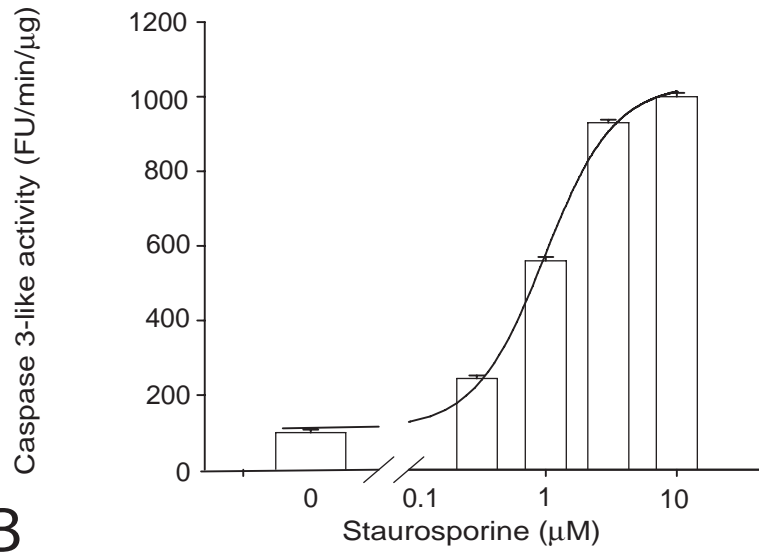**B**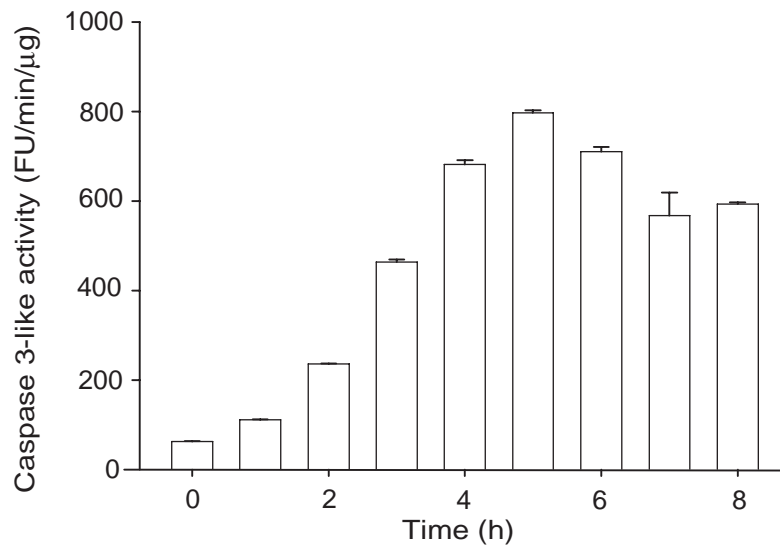

Supplement: NIHMS63875-supplement-01.pdf [file NIHMS63875-supplement-01.pdf]

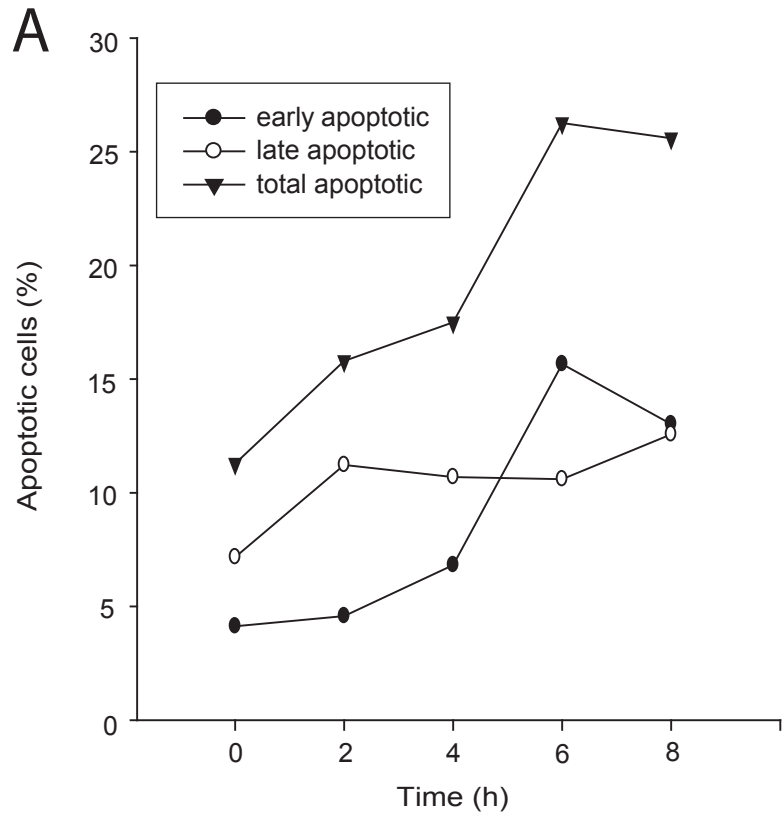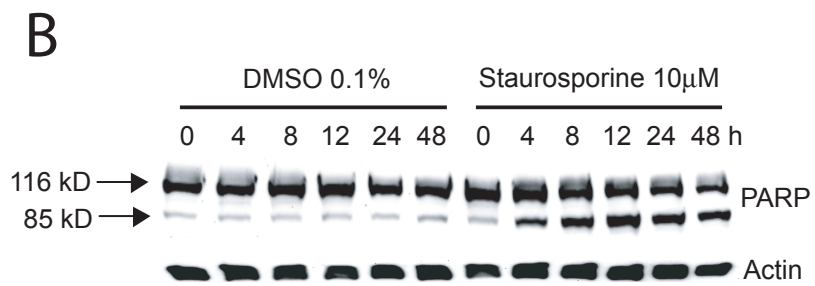

Supplement: NIHMS63875-supplement-02.pdf [file NIHMS63875-supplement-02.pdf]
